# Supplementary material for: Carboxymethylpullulan promoted Cu2O-catalyzed Huisgen-click reaction
Source: Royal Society of Chemistry journal article supplement (doi:10.1039/c4ra14813d), 2015-01-01

## Supporting Information

### Carboxymethylpullulans Promoted Cu<sub>2</sub>O-Catalyzed Huisgen-Click

#### Reaction

Weiwei Zhang, Baoqi Ren, Yuqin Jiang\*, Zhiguo Hu\*

Collaborative Innovation Center of Henan Province for Green Manufacturing of Fine Chemicals,  
Key Laboratory of Green Chemical Media and Reactions, Ministry of Education, School of Chemi-  
stry and Chemical Engineering, Henan Normal University, Xinxiang 453007, P. R. China.

E-mail: jiangyuqin@htu.cn; zghu@htu.cn.

#### Table of contents

|                                                                                               |        |
|-----------------------------------------------------------------------------------------------|--------|
| <b>I. General Information</b> .....                                                           | S2     |
| <b>II. Procedure for the synthesis of CMP</b> .....                                           | S2-3   |
| <b>III. General procedure for the synthesis of triazoles and the recyclability of CMP</b> ... | S3     |
| <b>IV. <sup>1</sup>H NMR and <sup>13</sup>C NMR Data of the Products</b> .....                | S4-9   |
| <b>V. <sup>1</sup>H and <sup>13</sup>C NMR Spectra of the Products</b> .....                  | S10-29 |

## I. General Information

All reagents were purchased from commercial sources and used without further treatment, unless otherwise indicated. The products were characterized using  $^1\text{H}$  NMR and  $^{13}\text{C}$  NMR (Bruker Avance/400) which used  $\text{CDCl}_3$  or  $\text{DMSO-d}_6$  as the solvent and TMS as internal standard. Data is represented as follows: chemical shift, integration, multiplicity (s = singlet, d = doublet, dd = double of doublets, t = triplet, q = quartet, m = multiplet, br = broad) and coupling constants ( $J$ ) in Hertz (Hz). The pH values of different amount of CMP in water were measured by a model PHS-3C pH meter (Shanghai Precision & Scientific Instrument Co., Ltd).

## II. Procedure for the synthesis of CMP

Pullulan (5 g, 30.86 mmol) in 20 mL water was dispersed in 6 mL isopropyl alcohol. NaOH (1.82 g, 45.75 mmol) in 5 mL water was added to the mixture above at  $70\text{ }^\circ\text{C}$  and stirred for 15 mins.  $\text{ClCH}_2\text{COONa}$  (3.6 g 30 mmol) was added together with 5 mL of water and 3 mL of isopropyl. The reaction mixture was vigorously stirred at  $70\text{ }^\circ\text{C}$  for 4 h. Then, the same amount of the addition of NaOH and  $\text{ClCH}_2\text{COONa}$  was repeated. The reaction was continued stirring and heating at  $70\text{ }^\circ\text{C}$  for another 3 h. The reaction mixture was precipitated with methanol and dialyzed against deionized water. The  $\text{H}^+$  form of CMP was obtained by dialysis against 0.1 M HCl for 2-3 h. Then, the excess of HCl was removed by dialysis against water for 3 day. The purified polymer was obtained by lyophilization.

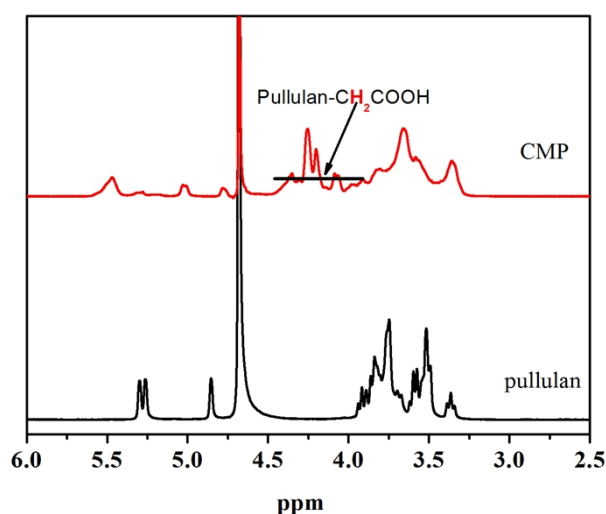

Figure 1.  $^1\text{H}$  NMR of pullulan and CMP

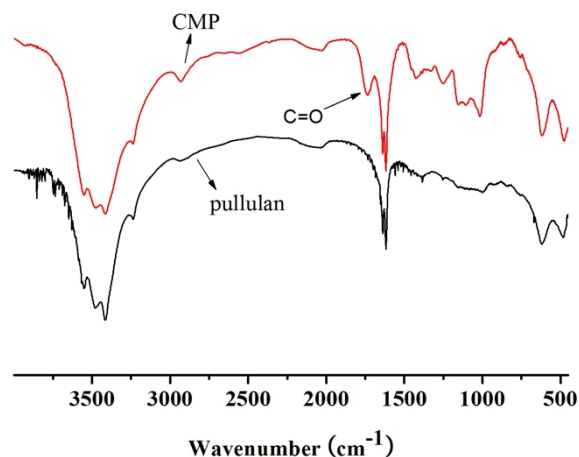

**Figure 2.** IR of pullulan and CMP

### **III. General procedure for the synthesis of triazoles and the recyclability of CMP**

Alkyne (1mmol), azide (1mmol), CMP (5 mol%) and  $\text{Cu}_2\text{O}$  (0.5 mol%) were dissolved (suspended) in deionized water (2 mL) and the reaction temperature was elevated to 60 °C. After the completion of the reaction, the resulting solution was extracted by EtOAc. The organic phase was dried with anhydrous  $\text{Na}_2\text{SO}_4$ , and the solvent was removed in vacuo to give the corresponding triazoles, which were purified by column chromatography (petroleum ether/EtOAc).

#### **Recyclability of the CMP for the model reaction**

Propargyl phenyl ether (10.0 mmol), azide benzyl (10.0 mmol), CMP (5 mol%) and  $\text{Cu}_2\text{O}$  (0.5 mol%) were dissolved (suspended) in deionized water (20 mL) and the reaction temperature was elevated to 60 °C. After the completion of the reaction, the resulting solution was extracted by EtOAc. The organic phase was dried with anhydrous  $\text{Na}_2\text{SO}_4$ , and the solvent was removed in vacuo to give the corresponding triazoles, which were purified by column chromatography (petroleum ether/EtOAc). The water phase was added propargyl phenyl ether (10.0 mmol), azide benzyl (10.0 mmol) and  $\text{Cu}_2\text{O}$  (0.5 mol%) again and the reaction repeated the above procedure for another 5 cycles.

#### IV. <sup>1</sup>H and <sup>13</sup>C NMR Data of the Products

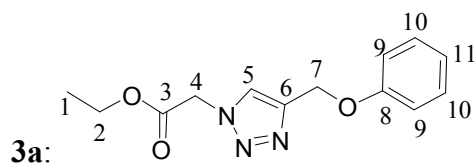

<sup>1</sup>H NMR (CDCl<sub>3</sub>, 400 MHz)  $\delta$ : 7.75 (s, 1H), 7.30-6.94 (m, 5H), 5.22 (s, 2H), 5.14 (s, 2H), 4.23 (q,  $J$  = 6.8 Hz, 2H), 1.28 (t,  $J$  = 7.2 Hz, 3H). <sup>13</sup>C NMR (CDCl<sub>3</sub>, 100 MHz)  $\delta$ : 166.3 (C-3), 158.2 (C-8), 144.6 (C-6), 129.6 (C-10), 124.3 (C-5), 121.3 (C-11), 114.8 (C-9), 62.4 (C-2), 61.8 (C-7), 50.9 (C-4), 14.0 (C-1).

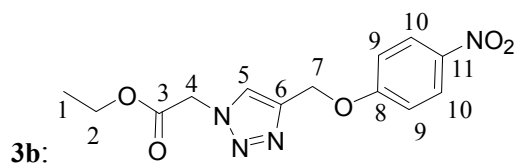

<sup>1</sup>H NMR (CDCl<sub>3</sub>, 400 MHz)  $\delta$ : 8.18 (d,  $J$  = 8.8 Hz, 2H), 7.82 (s, 1H), 7.07 (d,  $J$  = 9.2 Hz, 2H), 5.32 (s, 2H), 5.18 (s, 2H), 4.27 (q,  $J$  = 7.2 Hz, 2H), 1.29 (t,  $J$  = 3.2 Hz, 3H). <sup>13</sup>C NMR (CDCl<sub>3</sub>, 100 MHz)  $\delta$ : 166.1 (C-3), 163.1 (C-8), 143.2 (C-6), 141.9 (C-11), 125.9 (C-10), 124.5 (C-5), 114.9 (C-9), 62.6 (C-2), 62.4 (C-7), 51.0 (C-4), 14.1 (C-1).

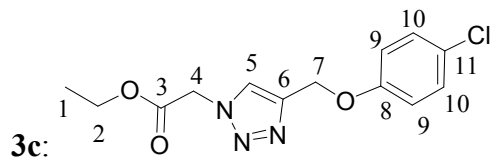

<sup>1</sup>H NMR (CDCl<sub>3</sub>, 400 MHz)  $\delta$ : 7.74 (s, 1H), 7.20 (d,  $J$  = 8.8 Hz, 2H), 6.89 (d,  $J$  = 8.4 Hz, 2H), 5.17 (s, 2H), 5.14 (s, 2H), 4.24 (q,  $J$  = 7.2 Hz, 2H), 1.27 (t,  $J$  = 7.2 Hz, 3H). <sup>13</sup>C NMR (CDCl<sub>3</sub>, 100 MHz)  $\delta$ : 166.2 (C-3), 156.8 (C-8), 144.2 (C-6), 129.4 (C-10), 126.2 (C-11), 124.2 (C-5), 116.2 (C-9), 62.5 (C-2), 62.2 (C-7), 50.9 (C-4), 14.0 (C-1).

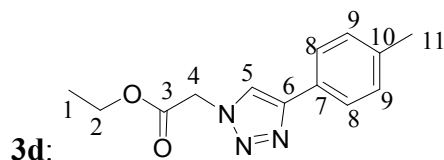

<sup>1</sup>H NMR (CDCl<sub>3</sub>, 400 MHz)  $\delta$ : 7.87 (s, 1H), 7.73 (d,  $J$  = 8.0 Hz, 2H), 7.24 (d,  $J$  = 8.0 Hz, 2H), 5.19 (s, 2H), 4.28 (q,  $J$  = 7.2 Hz, 2H), 2.38 (s, 3H), 1.30 (t,  $J$  = 7.2 Hz, 3H). <sup>13</sup>C NMR (CDCl<sub>3</sub>, 100 MHz)  $\delta$ : 166.3 (C-3), 148.3 (C-6), 138.2 (C-10), 129.5 (C-9), 127.5 (C-7), 125.7 (C-8), 120.6 (C-5), 62.5 (C-2), 51.0 (C-4), 21.3 (C-11), 14.1 (C-1).

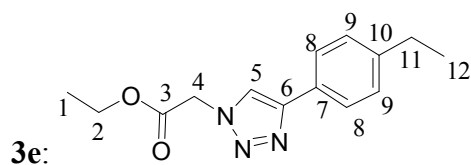

$^1\text{H}$  NMR ( $\text{CDCl}_3$ , 400 MHz)  $\delta$ : 7.88 (s, 1H), 7.75 (d,  $J = 8.0$  Hz, 2H), 7.25 (d,  $J = 8.0$  Hz, 2H), 5.18 (s, 2H), 4.26 (q,  $J = 7.2$  Hz, 2H), 2.67 (q,  $J = 7.2$  Hz, 2H), 1.31-1.23 (m, 6H).  $^{13}\text{C}$  NMR ( $\text{CDCl}_3$ , 100 MHz)  $\delta$ : 166.4 (C-3), 148.3 (C-6), 144.5 (C-10), 128.3 (C-9), 127.8 (C-7), 125.8 (C-8), 120.7 (C-5), 62.4 (C-2), 50.9 (C-4), 28.7 (C-11), 15.5 (C-1), 14.1 (C-12).

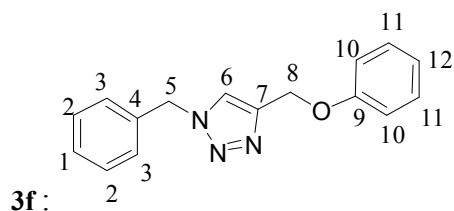

$^1\text{H}$  NMR ( $\text{CDCl}_3$ , 400 MHz)  $\delta$ : 7.53 (s, 1H), 7.38-7.26 (m, 7H), 6.97 (d,  $J = 8.4$  Hz, 3H), 5.53 (s, 2H), 5.19 (s, 2H).  $^{13}\text{C}$  NMR ( $\text{CDCl}_3$ , 100 MHz)  $\delta$ : 158.2 (C-9), 144.7 (C-7), 134.5 (C-4), 129.5 (C-11), 129.2 (C-3), 128.8 (C-1), 128.1 (C-2), 122.6 (C-6), 121.3 (C-12), 114.8 (C-10), 62.1 (C-8), 54.3 (C-5).

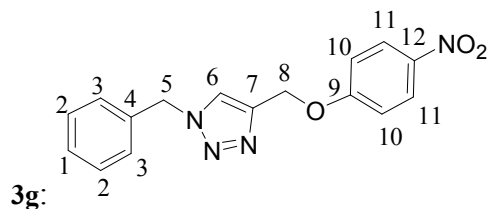

$^1\text{H}$  NMR ( $\text{CDCl}_3$ , 400 MHz)  $\delta$ : 8.13 (d,  $J = 9.2$  Hz, 2H), 7.60 (s, 1H), 7.36-7.26 (m, 5H), 7.02 (d,  $J = 9.2$  Hz, 2H), 5.53 (s, 2H), 5.24 (s, 2H).  $^{13}\text{C}$  NMR ( $\text{CDCl}_3$ , 100 MHz)  $\delta$ : 163.2 (C-9), 143.1 (C-7), 141.8 (C-12), 134.3 (C-4), 129.2 (C-3), 128.9 (C-1), 128.2 (C-2), 125.9 (C-11), 123.2 (C-6), 114.9 (C-10), 62.4 (C-8), 54.3 (C-5).

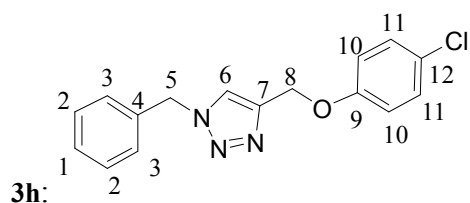

$^1\text{H}$  NMR ( $\text{CDCl}_3$ , 400 MHz)  $\delta$ : 7.53 (s, 1H), 7.39-7.24 (m, 5H), 7.20 (d,  $J = 8.8$  Hz, 2H), 6.88 (d,  $J = 9.2$  Hz, 2H), 5.50 (s, 2H), 5.12 (s, 2H).  $^{13}\text{C}$  NMR ( $\text{CDCl}_3$ , 100 MHz)  $\delta$ : 156.8 (C-9), 144.1 (C-7), 134.5 (C-4), 129.4 (C-11), 129.2 (C-3), 128.9 (C-1), 128.1 (C-2), 126.1 (C-12), 122.8 (C-6), 116.2 (C-10), 62.3 (C-8), 54.2 (C-5).

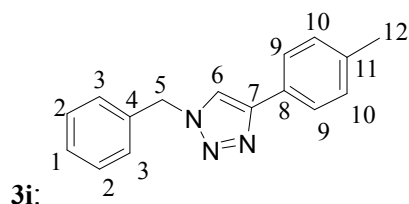

$^1\text{H}$  NMR ( $\text{CDCl}_3$ , 400 MHz)  $\delta$ : 7.69 (d,  $J = 7.6$  Hz, 2H), 7.63 (s, 1H), 7.38-7.29 (m, 5H), 7.20 (d,  $J = 8.0$  Hz, 2H), 5.55 (s, 2H), 2.36 (s, 3H).  $^{13}\text{C}$  NMR ( $\text{CDCl}_3$ , 100 MHz)  $\delta$ : 148.3 (C-8), 138.0 (C-4), 134.8 (C-11), 129.5 (C-3), 129.2 (C-1), 128.8 (C-10), 128.1 (C-2), 127.7 (C-8), 125.6 (C-9), 119.2 (C-6), 54.2 (C-5), 21.3 (C-12).

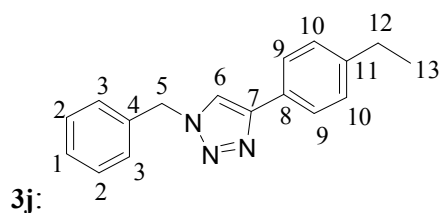

$^1\text{H}$  NMR ( $\text{CDCl}_3$ , 400 MHz)  $\delta$ : 7.72 (d,  $J = 8.0$  Hz, 2H), 7.64 (s, 1H), 7.38-7.29 (m, 5H), 7.23 (d,  $J = 8.0$  Hz, 2H), 5.55 (s, 2H), 2.66 (q,  $J = 7.6$  Hz, 2H), 1.24 (t,  $J = 7.6$  Hz, 3H).  $^{13}\text{C}$  NMR ( $\text{CDCl}_3$ , 100 MHz)  $\delta$ : 148.3 (C-7), 144.4 (C-11), 134.8 (C-4), 129.1 (C-3), 128.7 (C-1), 128.3 (C-10), 128.0 (C-2, 8), 125.7 (C-9), 119.3 (C-6), 54.2 (C-5), 28.7 (C-12), 15.5 (C-13).

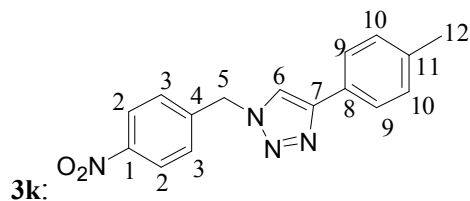

$^1\text{H}$  NMR ( $\text{CDCl}_3$ , 400 MHz)  $\delta$ : 8.17 (d,  $J = 8.4$  Hz, 2H), 7.75 (s, 1H), 7.68 (d,  $J = 8.0$  Hz, 2H), 7.40 (d,  $J = 8.0$  Hz, 2H), 7.20 (d,  $J = 8.0$  Hz, 2H), 5.65 (s, 2H), 2.35 (s, 3H).  $^{13}\text{C}$  NMR ( $\text{CDCl}_3$ , 100 MHz)  $\delta$ : 148.7 (C-1), 148.0 (C-7), 141.9 (C-4), 138.4 (C-11), 129.6 (C-3), 128.6 (C-10), 127.3 (C-8), 125.6 (C-9), 124.3 (C-2), 119.6 (C-6), 53.1 (C-5), 21.3 (C-12).

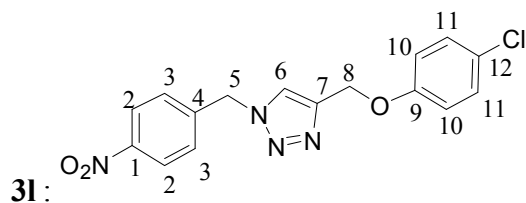

$^1\text{H}$  NMR ( $\text{CDCl}_3$ , 400 MHz)  $\delta$ : 8.20 (d,  $J = 8.4$  Hz, 2H), 7.62 (s, 1H), 7.39 (d,  $J = 8.0$  Hz, 2H), 7.21 (d,  $J = 8.4$  Hz, 2H), 6.88 (d,  $J = 8.4$  Hz, 2H), 5.65 (s, 2H), 5.17 (s, 2H).

$^{13}\text{C}$  NMR ( $\text{CDCl}_3$ , 100 MHz)  $\delta$ : 156.7 (C-9), 148.1 (C-1), 144.8 (C-7), 141.5 (C-4), 129.5 (C-11), 128.6 (C-3), 126.3 (C-12), 124.3 (C-2), 123.0 (C-6), 116.1 (C-10), 62.2 (C-8), 53.2 (C-5).

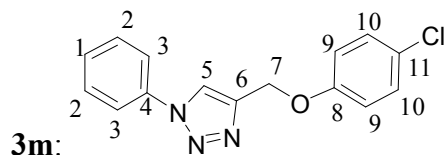

$^1\text{H}$  NMR ( $\text{CDCl}_3$ , 400 MHz)  $\delta$ : 8.05 (s, 1H), 7.72 (dd,  $J = 8.0$  Hz, 2.0 Hz, 2H), 7.54-7.44 (m, 3H), 7.25 (dd,  $J = 6.8$  Hz, 2.4 Hz, 2H), 6.95 (dd,  $J = 6.8$  Hz, 2.4 Hz, 2H), 5.26 (s, 2H).  $^{13}\text{C}$  NMR ( $\text{CDCl}_3$ , 100 MHz)  $\delta$ : 156.8 (C-8), 144.6 (C-6), 136.9 (C-4), 129.8 (C-10), 129.5 (C-1), 129.0 (C-2), 126.3 (C-11), 121.0 (C-5), 120.6 (C-3), 116.1 (C-9), 62.2 (C-7).

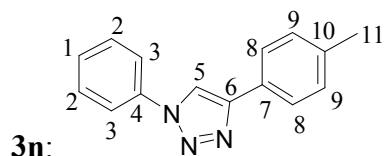

$^1\text{H}$  NMR ( $\text{CDCl}_3$ , 400 MHz)  $\delta$ : 8.16 (s, 1H), 7.80 (dd,  $J = 7.6$  Hz, 6.0 Hz, 4H), 7.57-7.26 (m, 5H), 2.40 (s, 3H).  $^{13}\text{C}$  NMR ( $\text{CDCl}_3$ , 100 MHz)  $\delta$ : 148.5 (C-6), 138.3 (C-4), 137.1 (C-10), 129.8 (C-1), 129.6 (C-2), 128.7 (C-9), 127.4 (C-7), 125.8 (C-8), 120.5 (C-5), 117.3 (C-3), 21.3 (C-11).

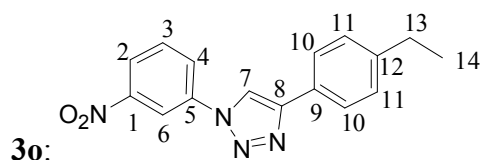

$^1\text{H}$  NMR ( $\text{DMSO-}d_6$ , 400 MHz)  $\delta$ : 9.44 (s, 1H), 8.73 (s, 1H), 8.40 (d,  $J = 7.6$  Hz, 1H), 8.29 (d,  $J = 8.0$  Hz, 1H), 7.88 (t,  $J = 8.0$  Hz, 1H), 7.82 (d,  $J = 7.6$  Hz, 2H), 7.30 (d,  $J = 7.6$  Hz, 2H), 2.63 (q,  $J = 7.2$  Hz, 2H), 1.19 (t,  $J = 7.2$  Hz, 3H).  $^{13}\text{C}$  NMR ( $\text{DMSO-}d_6$ , 100 MHz)  $\delta$ : 149.0 (C-8), 148.2 (C-1), 144.6 (C-12), 137.7 (C-5), 132.0 (C-3), 128.8 (C-11), 127.8 (C-9), 126.2 (C-4), 125.8 (C-7), 123.4 (C-10), 119.9 (C-2), 114.8 (C-6), 28.4 (C-13), 15.9 (C-14).

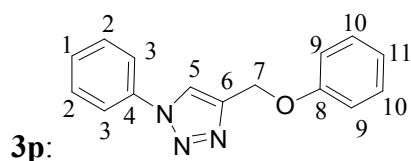

$^1\text{H}$  NMR ( $\text{CDCl}_3$ , 400 MHz)  $\delta$ : 8.06 (s, 1H), 7.74 (d,  $J = 7.6$  Hz, 2H), 7.54-7.45 (m,

3H), 7.32 (t,  $J = 8.0$  Hz, 2H), 7.04-6.98 (m, 3H), 5.31 (s, 2H).  $^{13}\text{C}$  NMR ( $\text{CDCl}_3$ , 100 MHz)  $\delta$ : 158.2 (C-8), 145.1 (C-6), 137.0 (C-4), 129.8 (C-10), 129.6 (C-1), 128.9 (C-2), 121.4 (C-5), 120.9 (C-11), 120.6 (C-3), 114.8 (C-9), 62.0 (C-7).

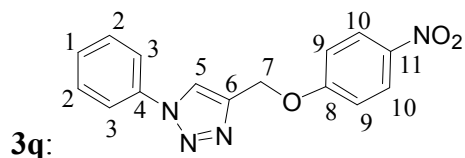

$^1\text{H}$  NMR ( $\text{CDCl}_3$ , 400 MHz)  $\delta$ : 8.21 (tt,  $J = 9.2$  Hz, 2.0 Hz, 2H), 8.13 (s, 1H), 7.75 (d,  $J = 8.4$  Hz, 2H), 7.54 (t,  $J = 8.0$  Hz, 2H), 7.47 (t,  $J = 7.6$  Hz, 1H), 7.12 (dd,  $J = 7.2$  Hz, 2.0 Hz, 2H), 5.39 (s, 2H).  $^{13}\text{C}$  NMR ( $\text{CDCl}_3$ , 100 MHz)  $\delta$ : 163.1 (C-8), 143.5 (C-6), 141.9 (C-11), 136.8 (C-4), 129.9 (C-1), 129.1 (C-2), 126.0 (C-10), 121.4 (C-5), 120.6 (C-3), 114.9 (C-9), 62.4 (C-7).

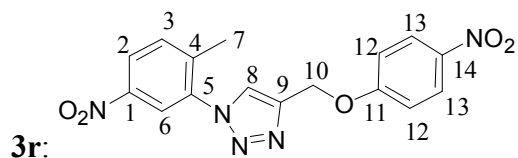

$^1\text{H}$  NMR ( $\text{DMSO-}d_6$ , 400 MHz)  $\delta$ : 8.85 (s, 1H), 8.37 (d,  $J = 6.8$  Hz, 2H), 8.26 (d,  $J = 8.8$  Hz, 2H), 7.82 (d,  $J = 9.2$  Hz, 1H), 7.33 (d,  $J = 9.2$  Hz, 2H), 5.46 (s, 2H), 2.32 (s, 3H).  $^{13}\text{C}$  NMR ( $\text{DMSO-}d_6$ , 100 MHz)  $\delta$ : 163.6 (C-11), 146.5 (C-1), 142.7 (C-4), 141.8 (C-9), 141.5 (C-14), 136.8 (C-5), 133.3 (C-3), 127.3 (C-8), 126.3 (C-2), 124.8 (C-13), 121.5 (C-6), 115.8 (C-12), 62.2 (C-10), 18.4 (C-7).

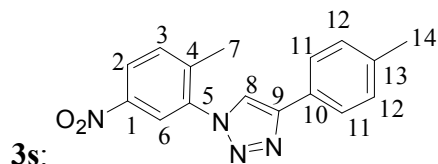

$^1\text{H}$  NMR ( $\text{CDCl}_3$ , 400 MHz)  $\delta$ : 8.30-8.27 (m, 2H), 8.02 (s, 1H), 7.80 (d,  $J = 8.0$  Hz, 2H), 7.60 (d,  $J = 9.2$  Hz, 1H), 7.28 (d,  $J = 8.0$  Hz, 2H), 2.44 (s, 3H), 2.41 (s, 3H).  $^{13}\text{C}$  NMR ( $\text{CDCl}_3$ , 100 MHz)  $\delta$ : 148.2 (C-9), 146.4 (C-1), 141.6 (C-4), 138.6 (C-5), 136.8 (C-13), 132.6 (C-3), 129.6 (C-12), 126.9 (C-10), 125.7 (C-8), 124.2 (C-11), 121.1 (C-2), 120.7 (C-6), 21.3 (C-14), 18.6 (C-7).

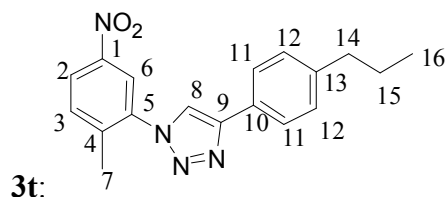



---

$^1\text{H}$  NMR (DMSO- $d_6$ , 400 MHz)  $\delta$ : 9.07 (s, 1H), 8.42-8.35 (m, 2H), 7.88 (d,  $J = 8.0$  Hz, 2H), 7.83 (d,  $J = 8.8$  Hz, 1H), 7.32 (d,  $J = 8.0$  Hz, 2H), 2.60 (t,  $J = 7.6$  Hz, 2H), 2.40 (s, 3H), 1.68-1.58 (m, 2H), 0.92 (t,  $J = 7.6$  Hz, 3H).  $^{13}\text{C}$  NMR (DMSO- $d_6$ , 100 MHz)  $\delta$ : 147.3 (C-9), 146.5 (C-1), 142.7 (C-4), 141.6 (C-13), 136.9 (C-5), 133.3 (C-3), 129.3 (C-10), 128.0 (C-12), 125.8 (C-8), 124.5 (C-2), 123.2 (C-6), 121.2 (C-11), 37.4 (C-14), 24.4 (C-15), 18.6 (C-7), 14.0 (C-16).

## V. <sup>1</sup>H and <sup>13</sup>C NMR Spectra of the Products

3a:

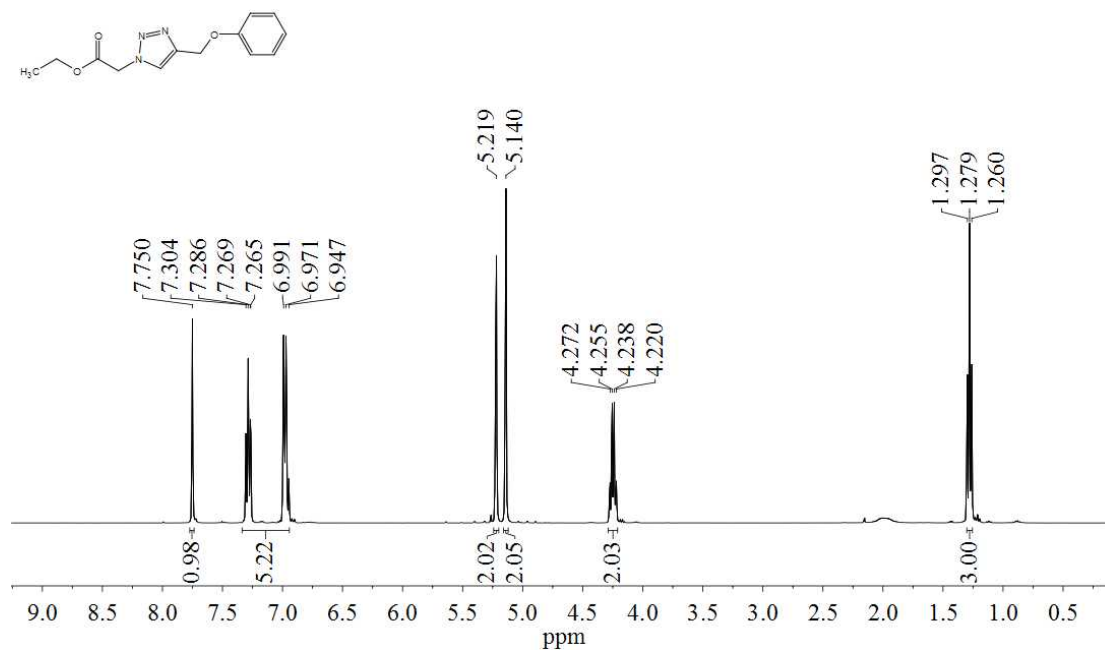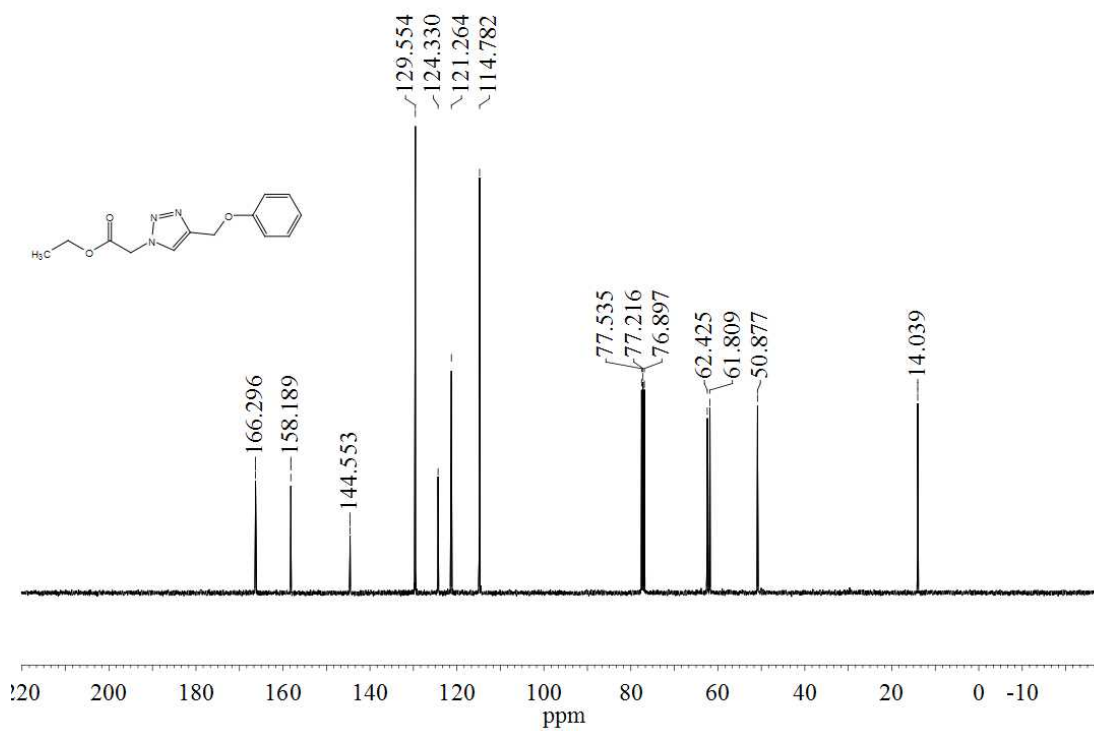

3b:

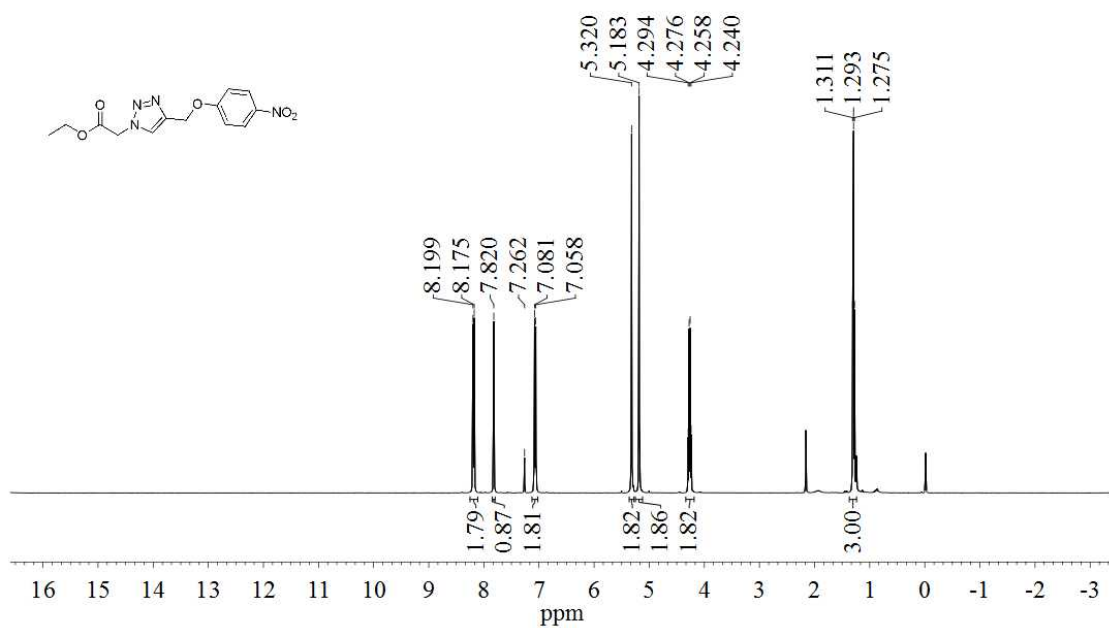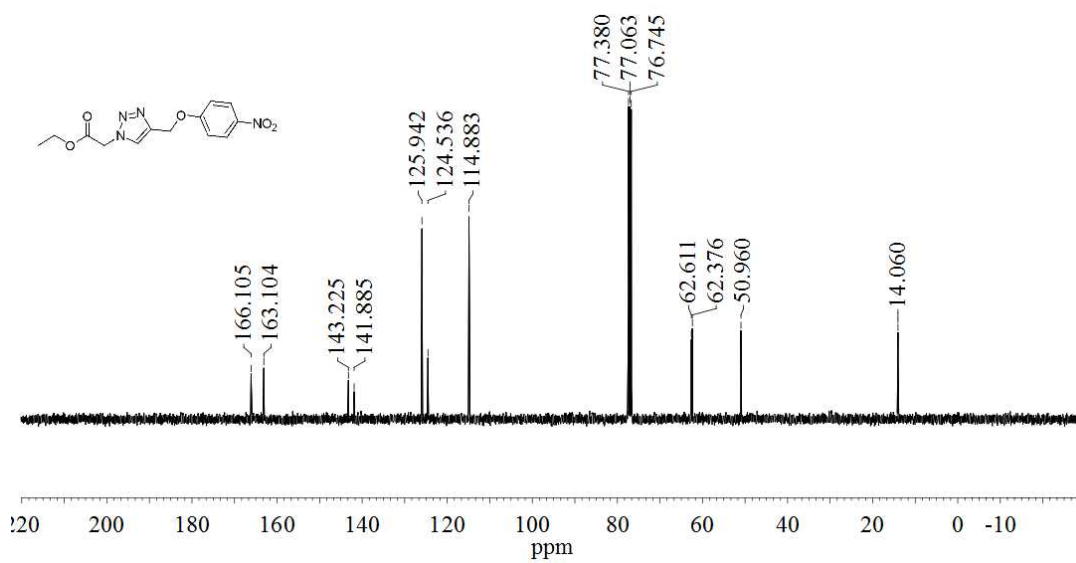

3c:

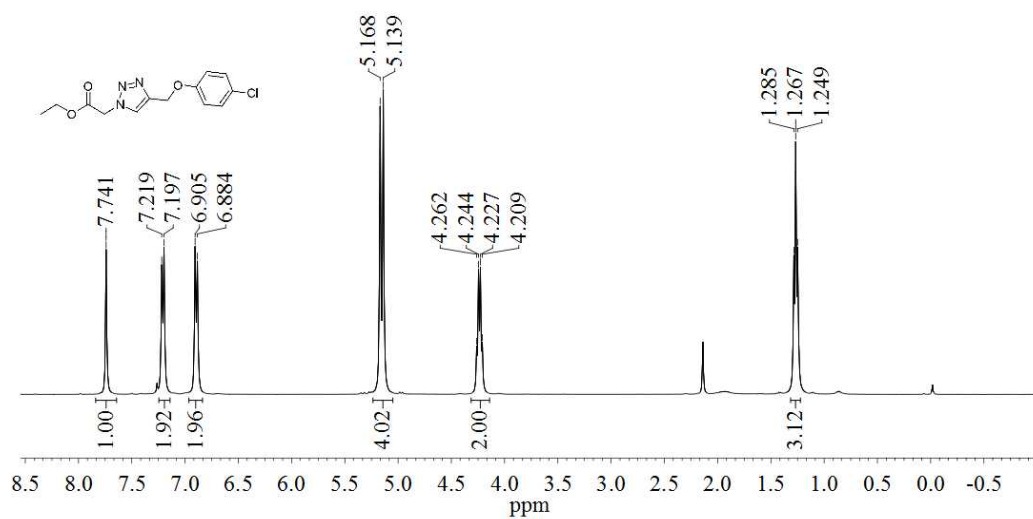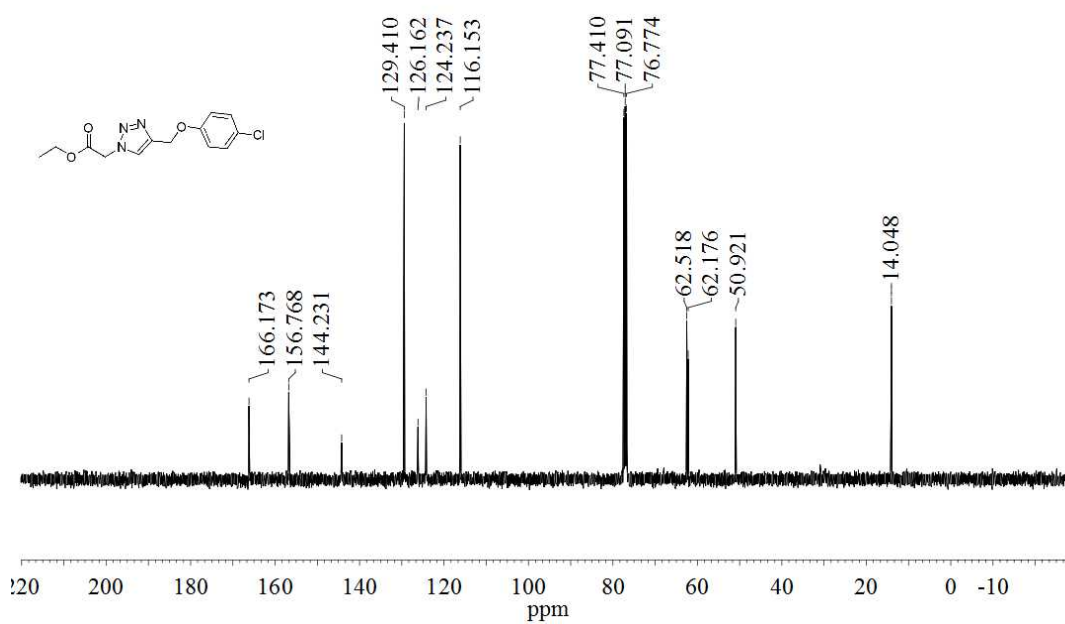

3d:

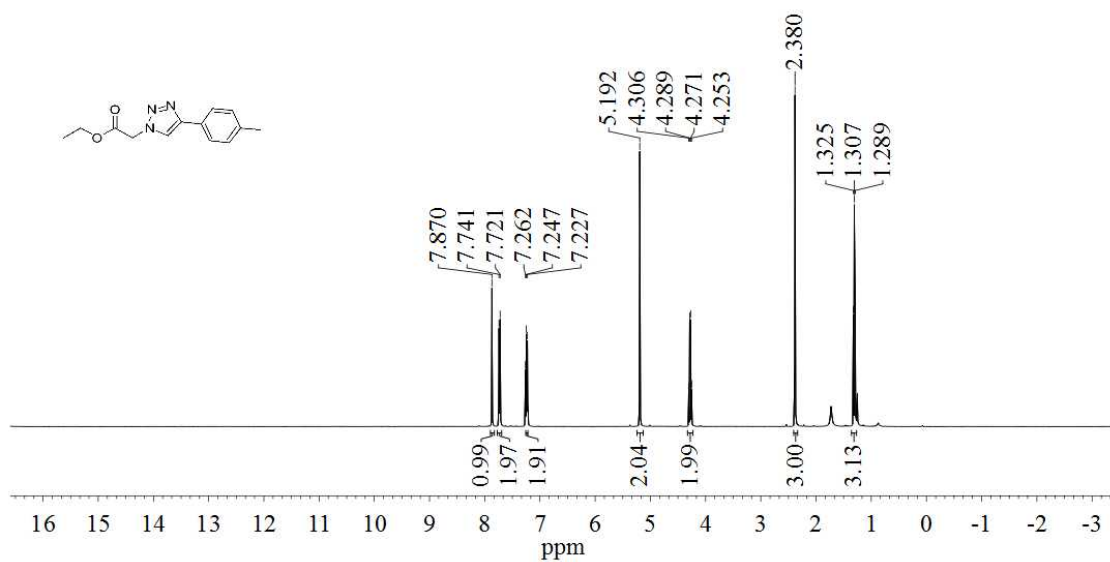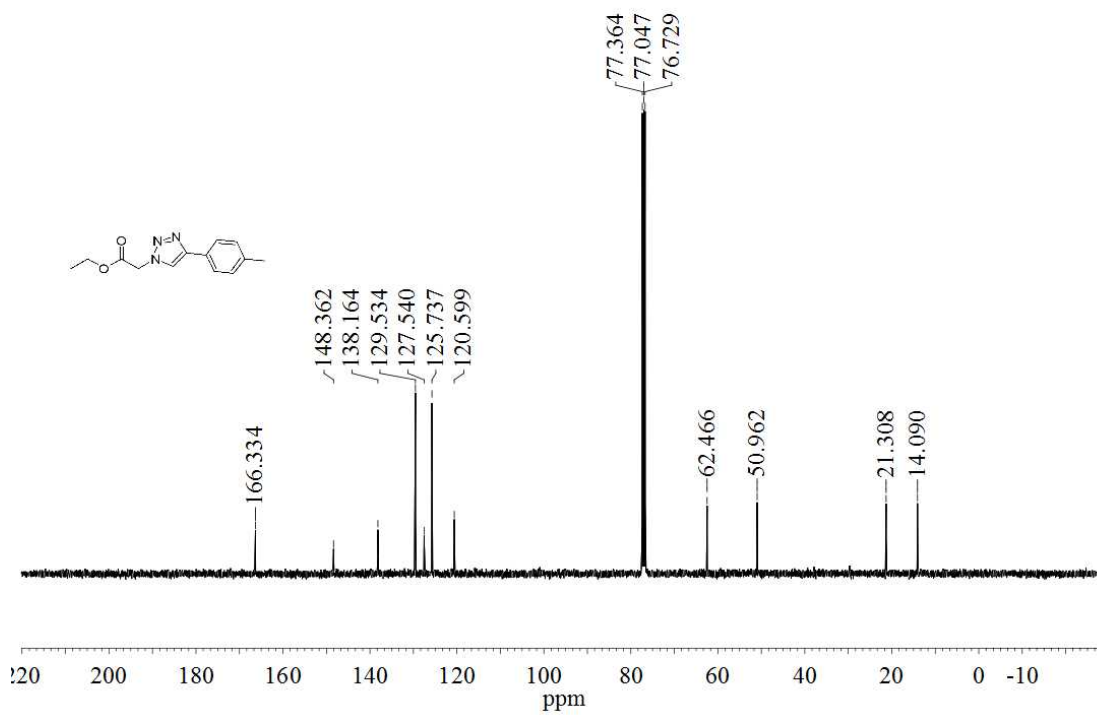

3e:

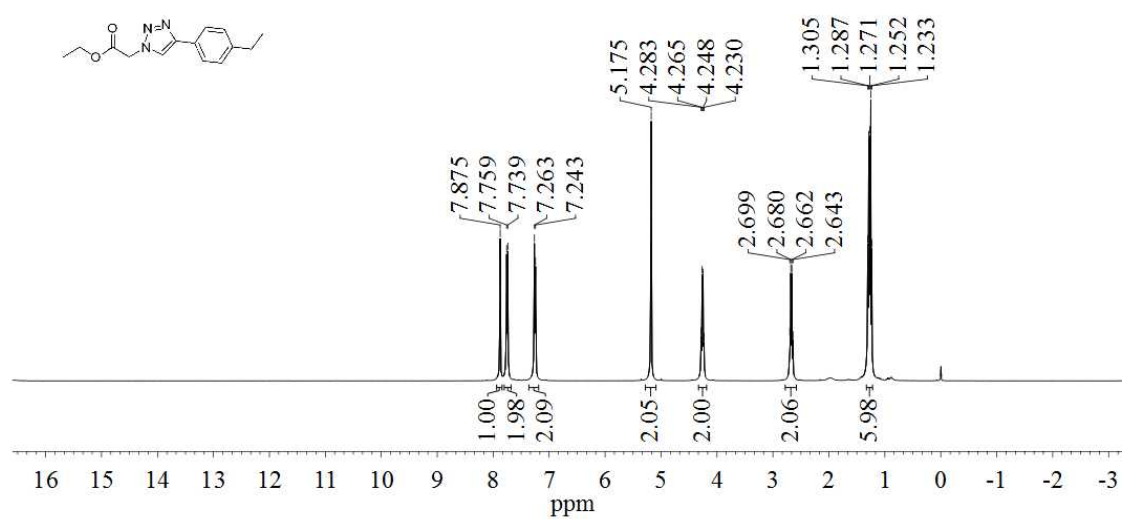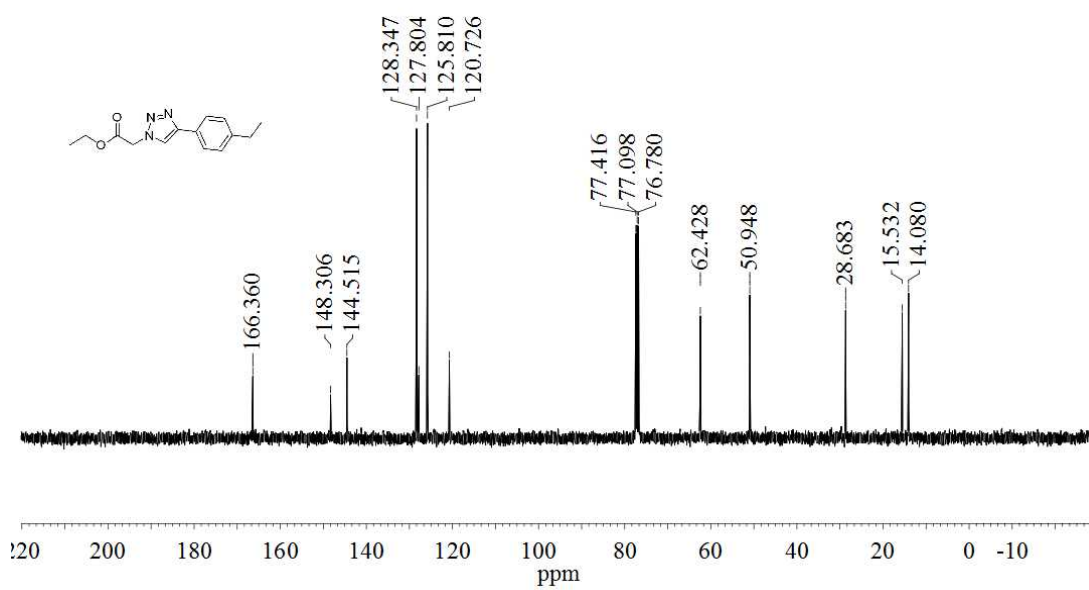

3f:

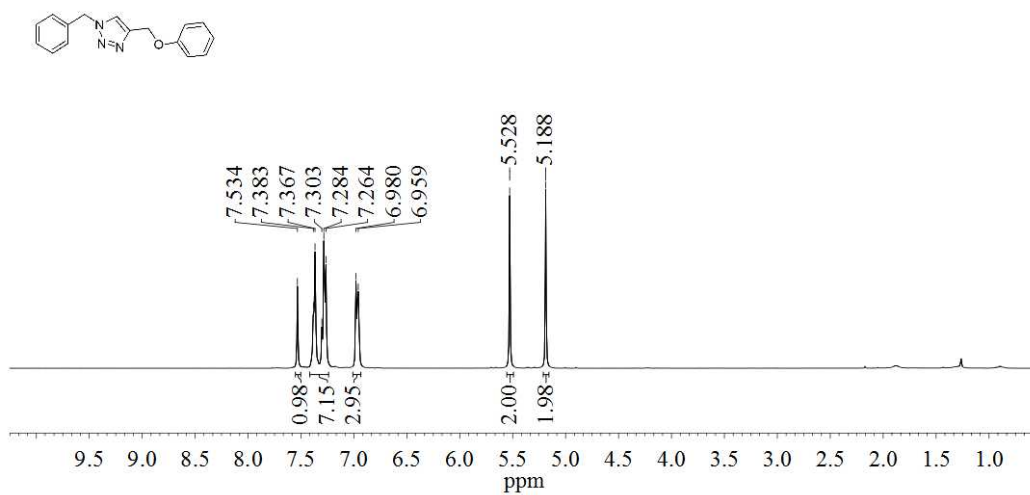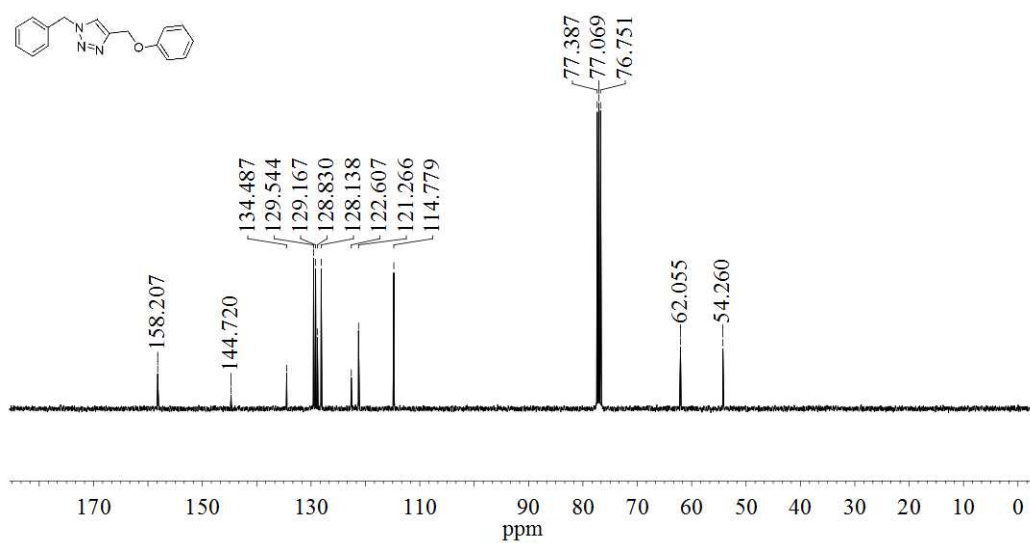

3g:

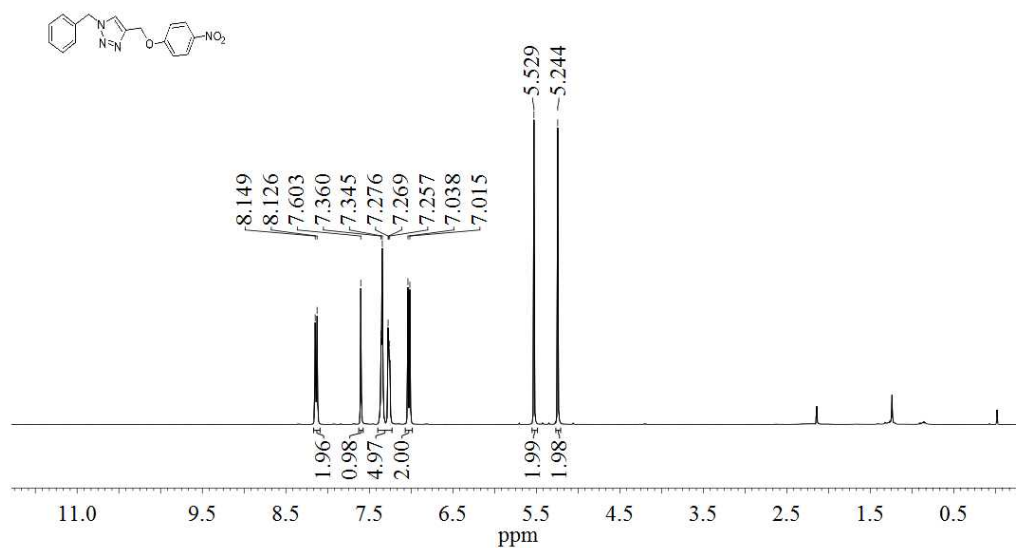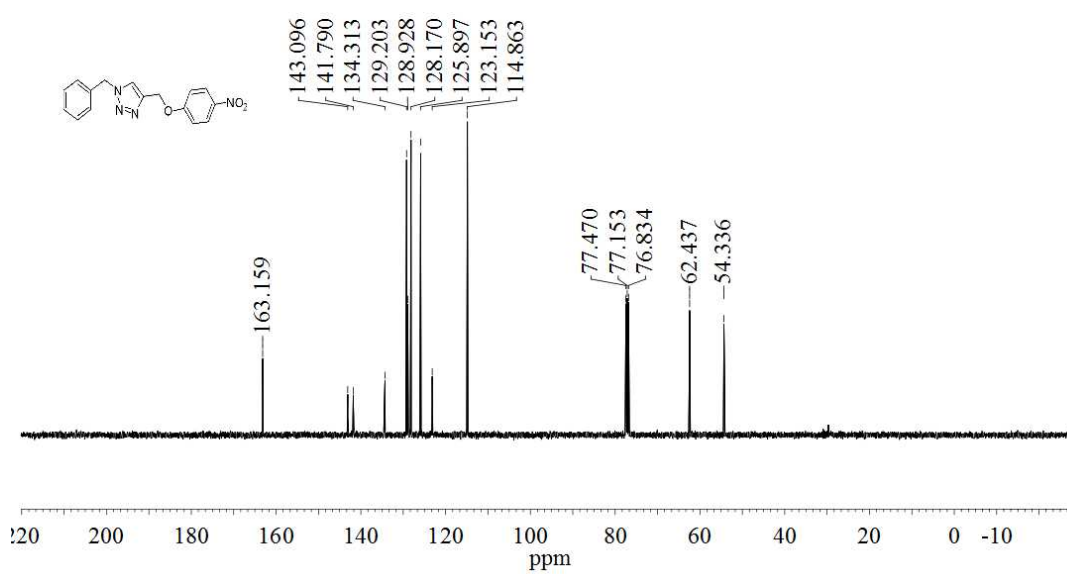



3h:

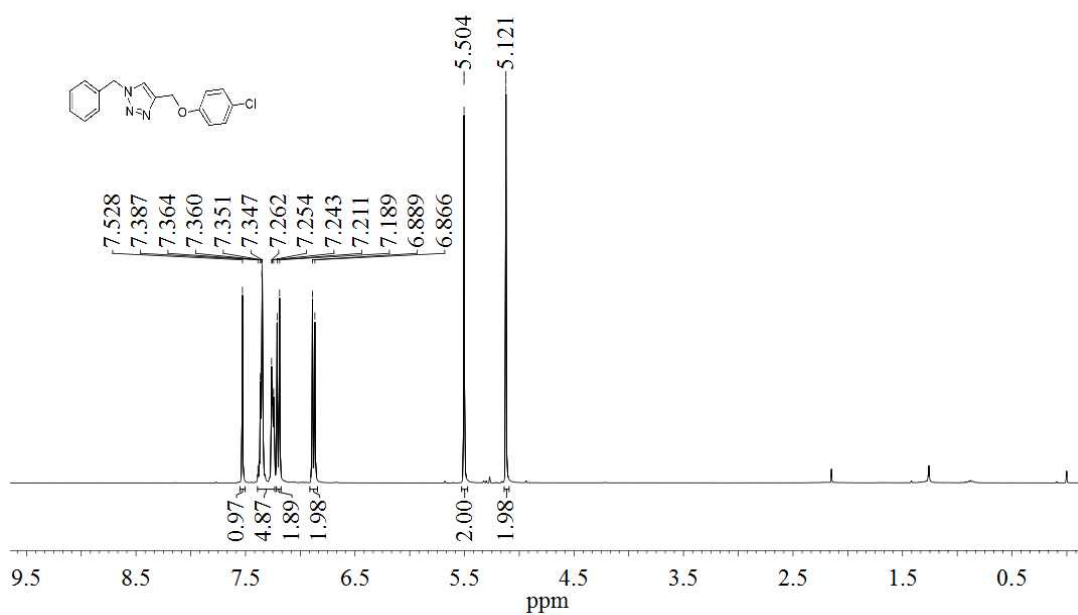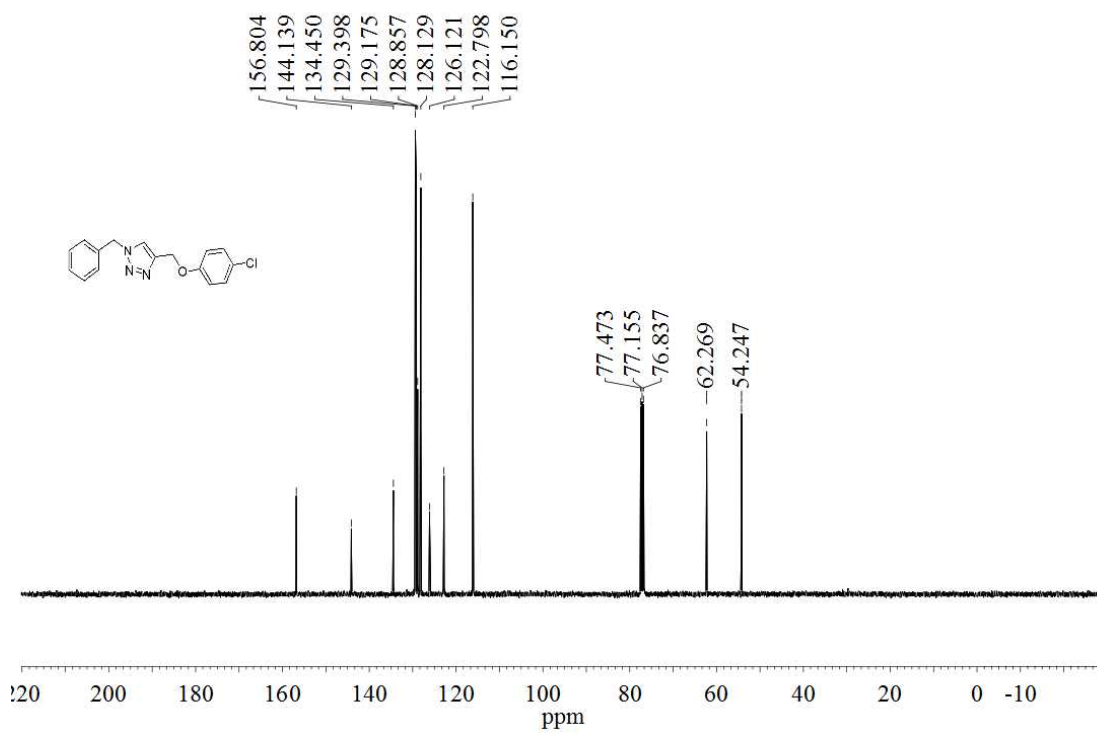

3i:

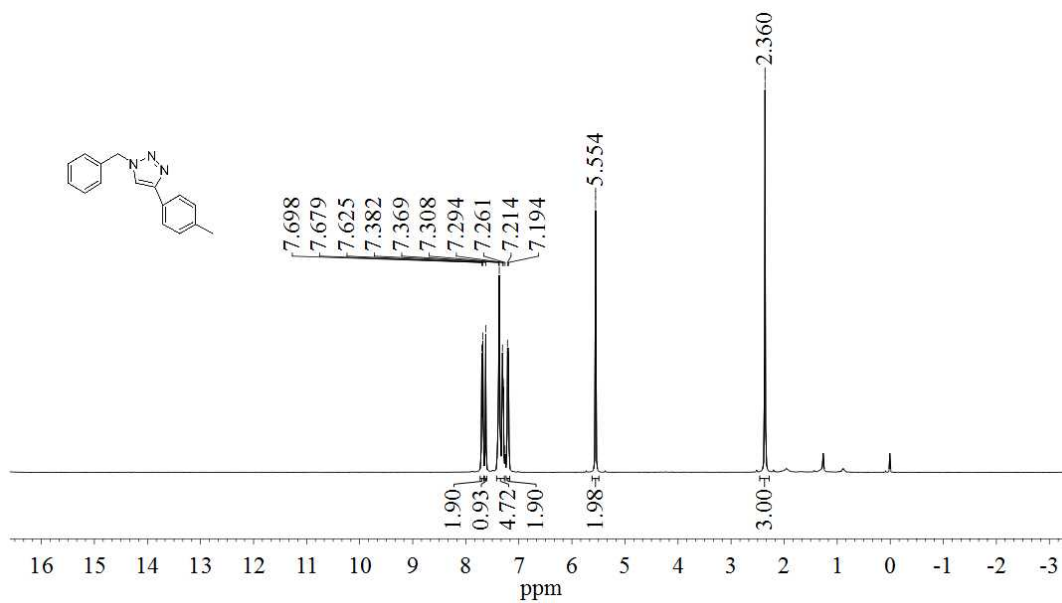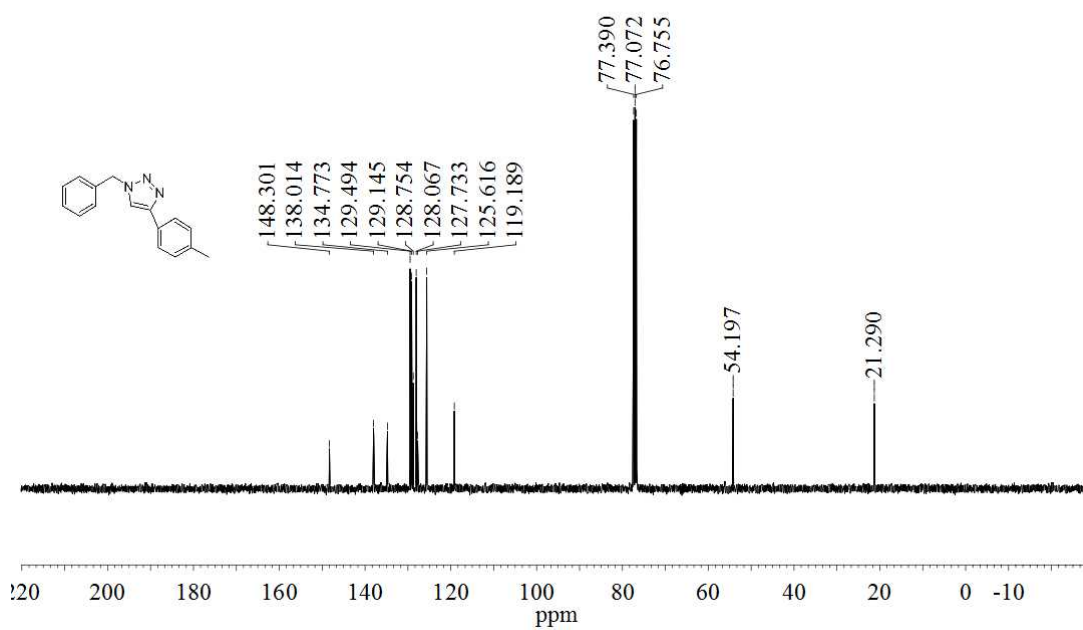

3j:

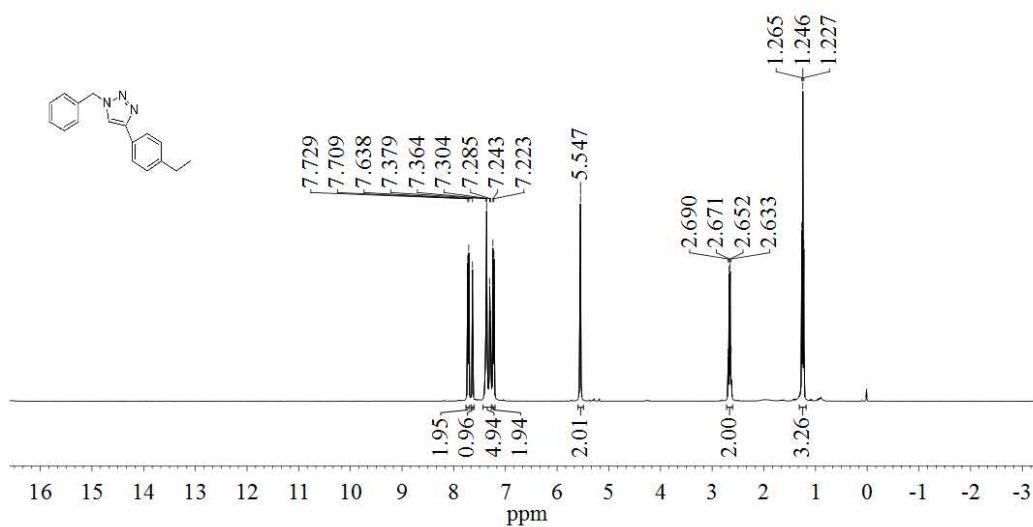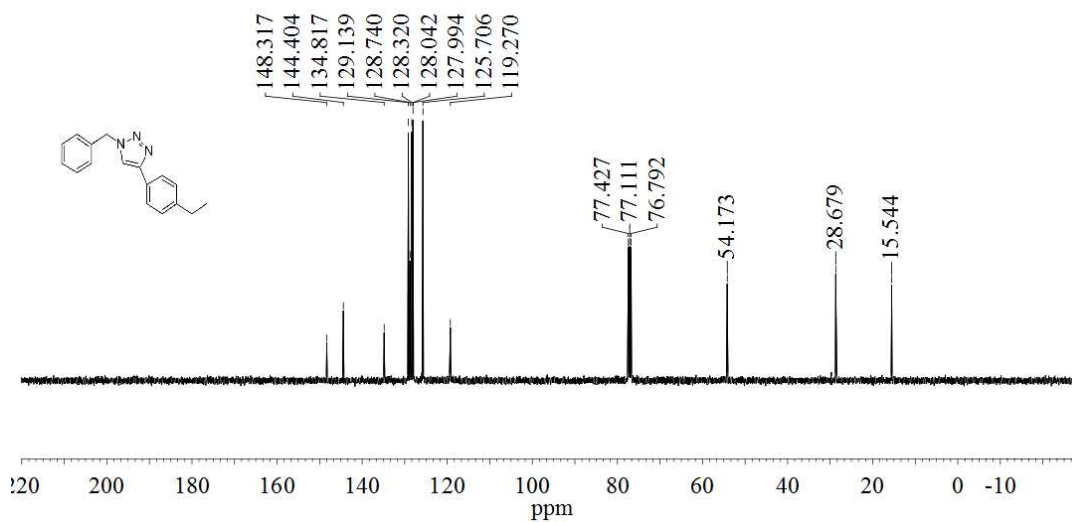

3k:

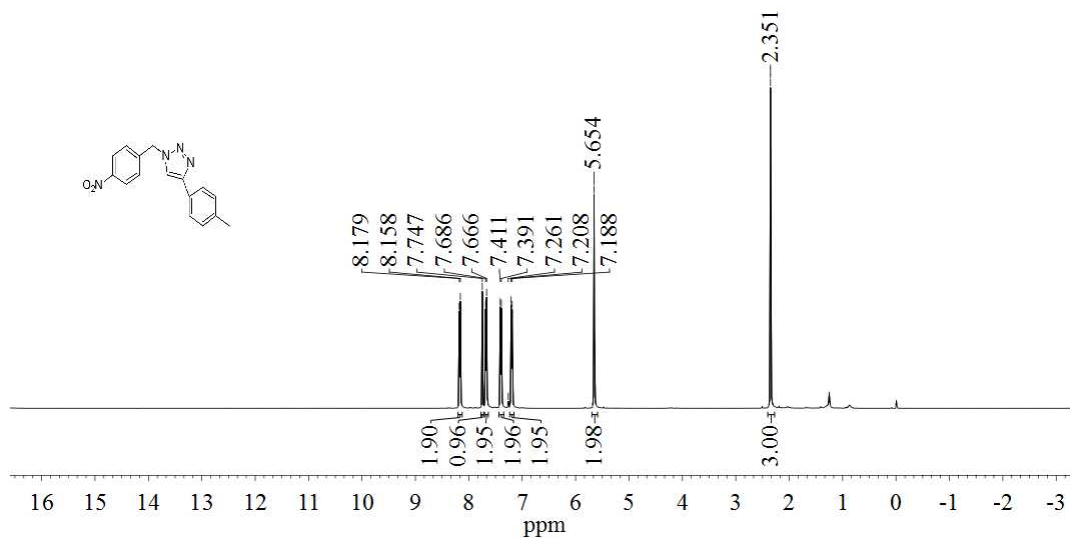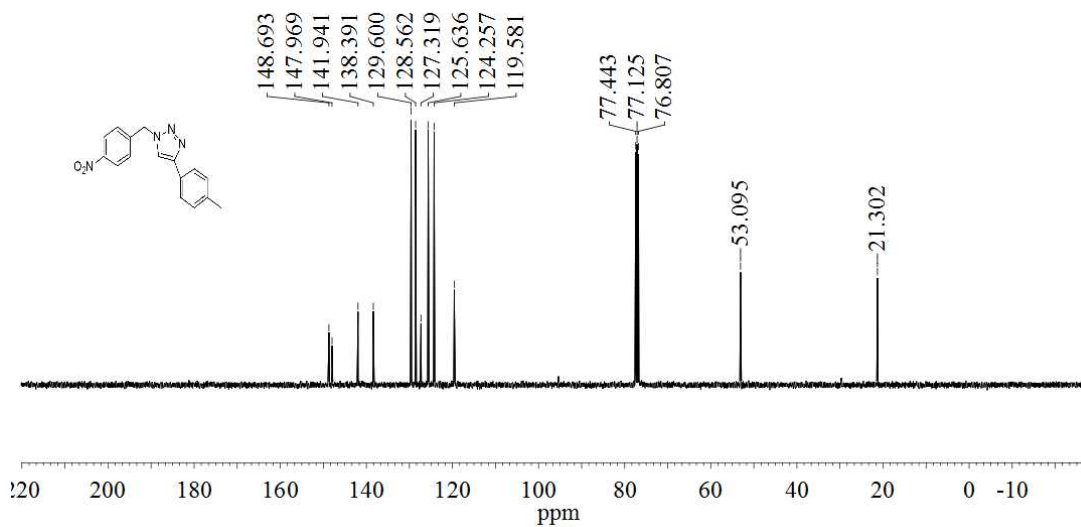

3l:

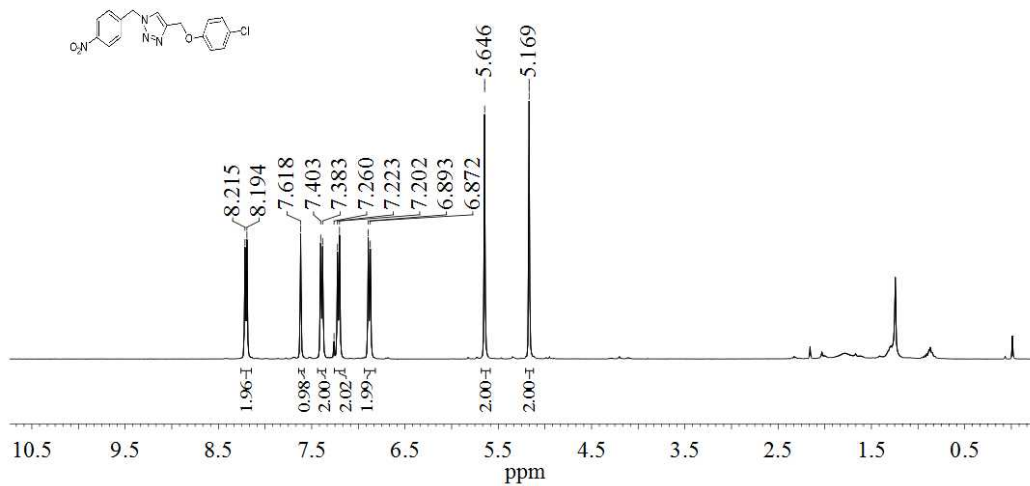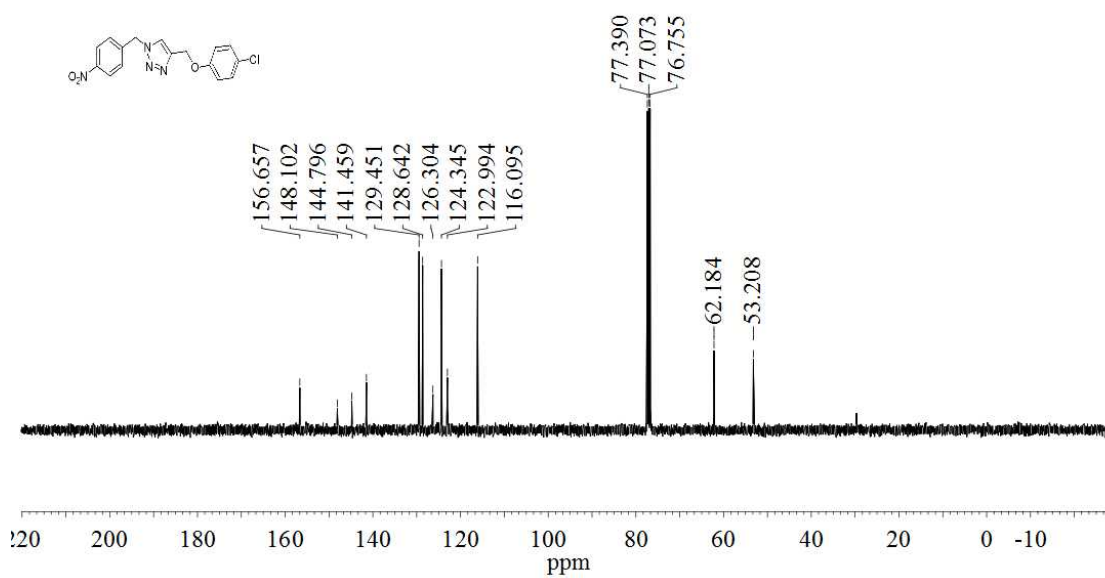

3m:

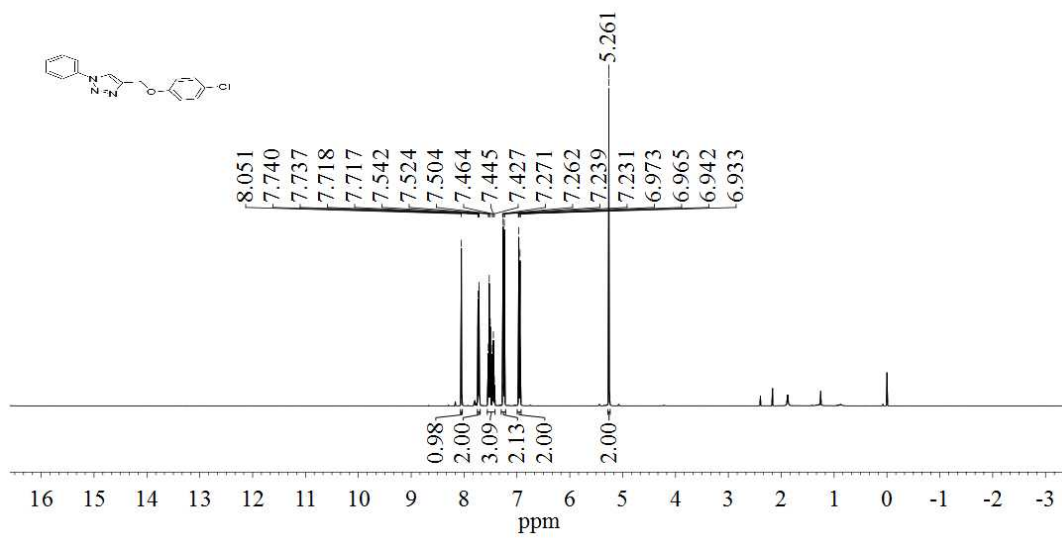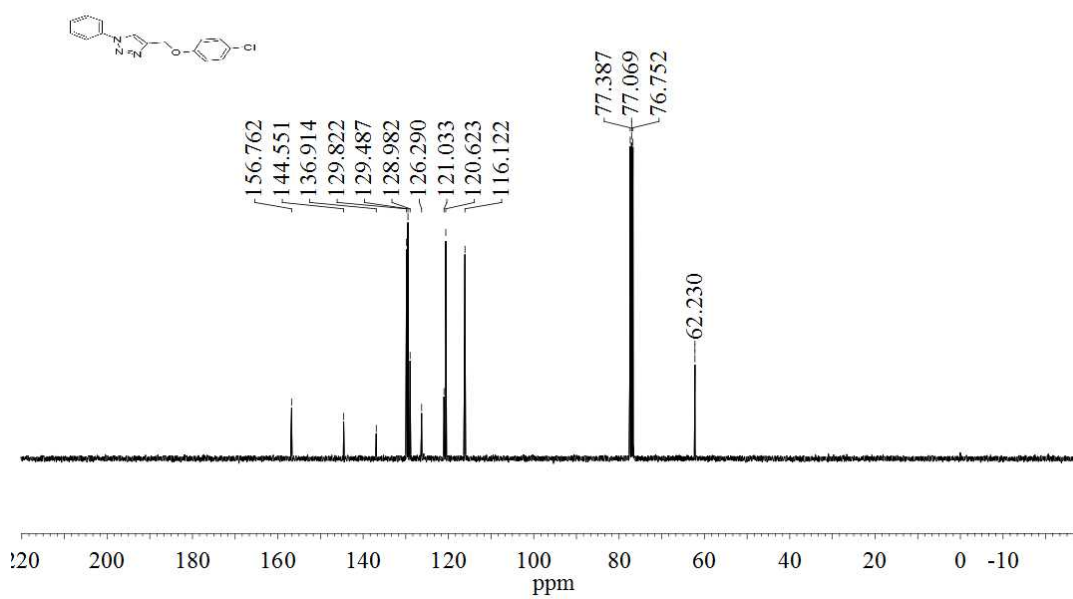

3n:

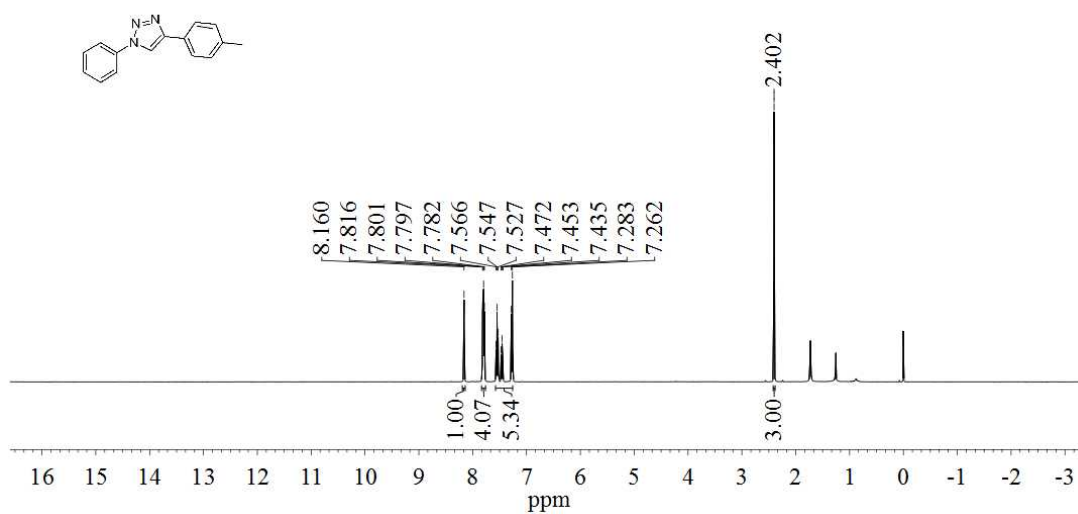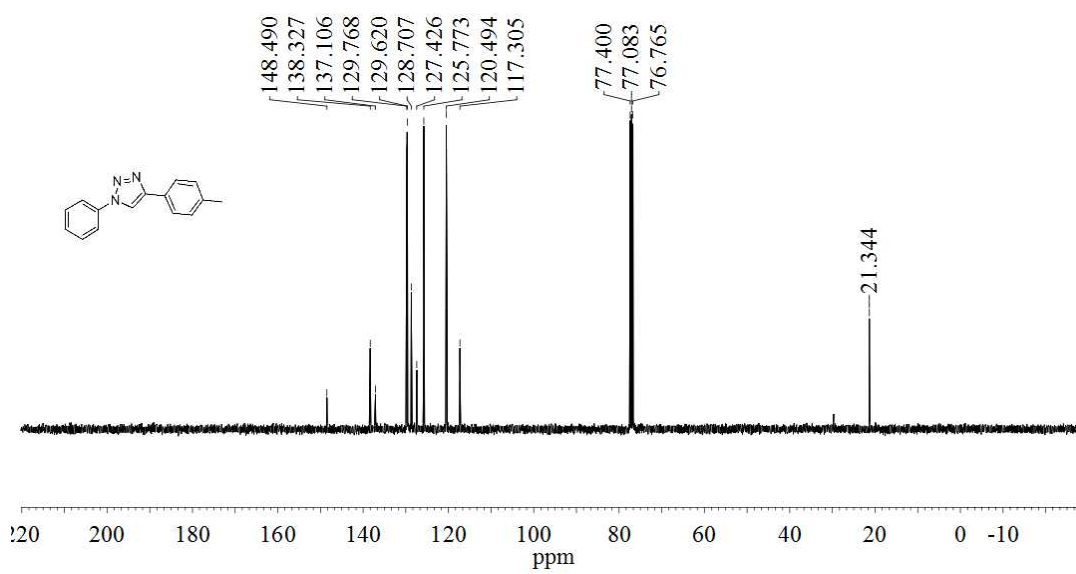

30:

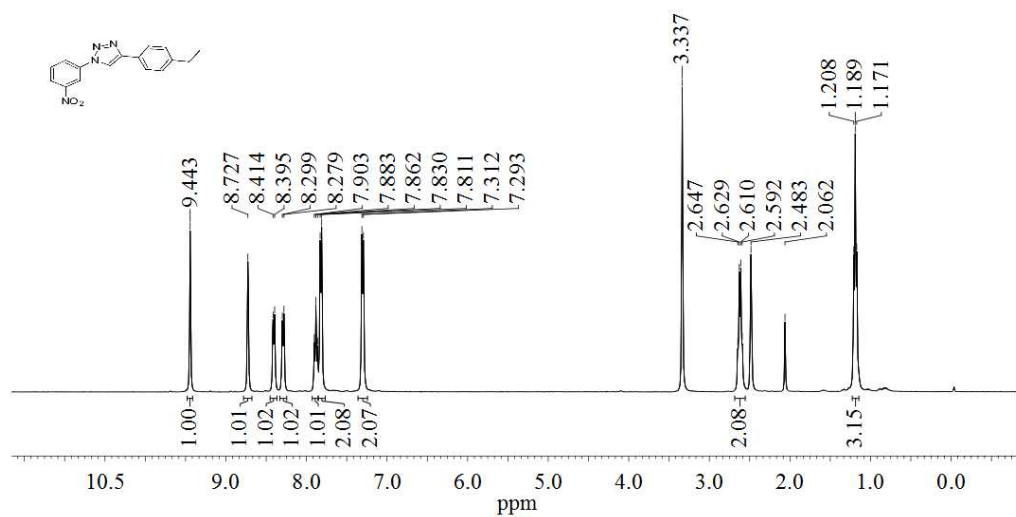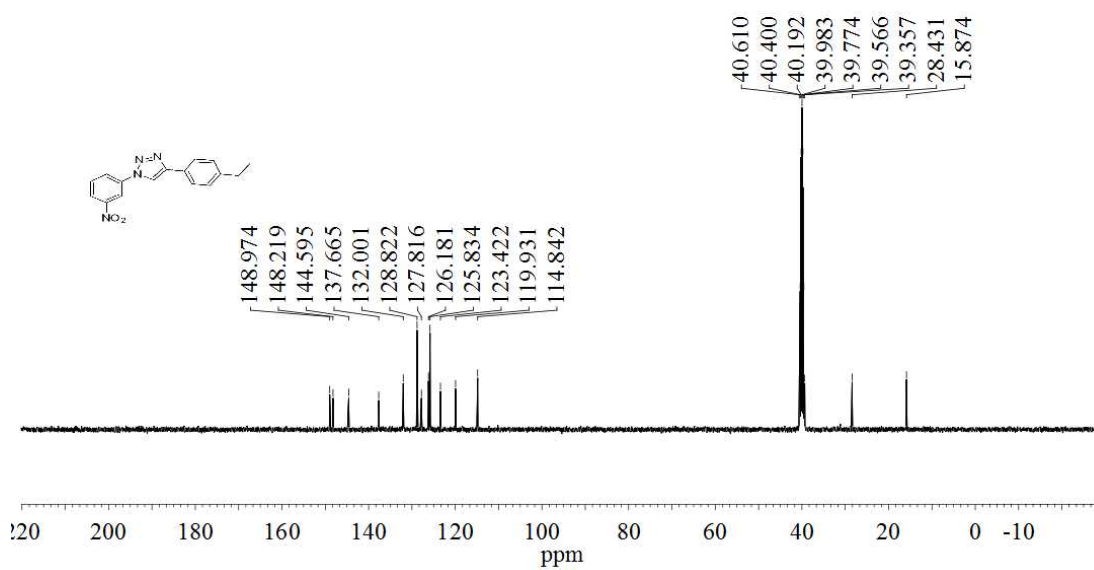



3p:

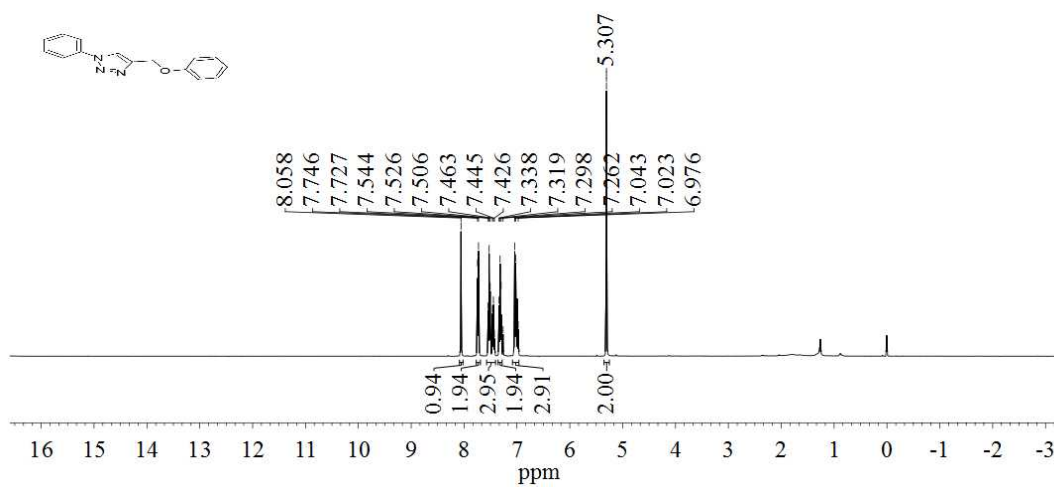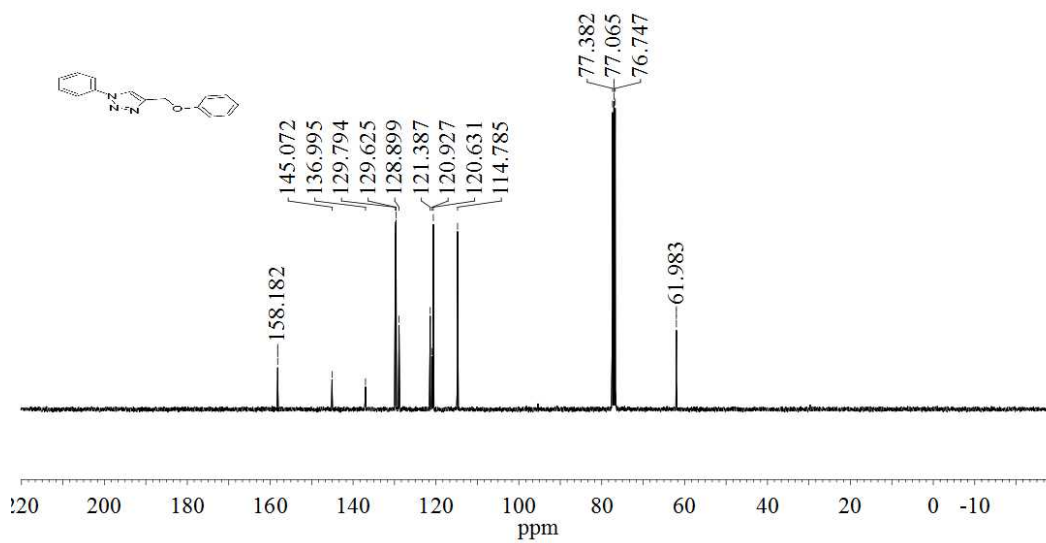

3q:

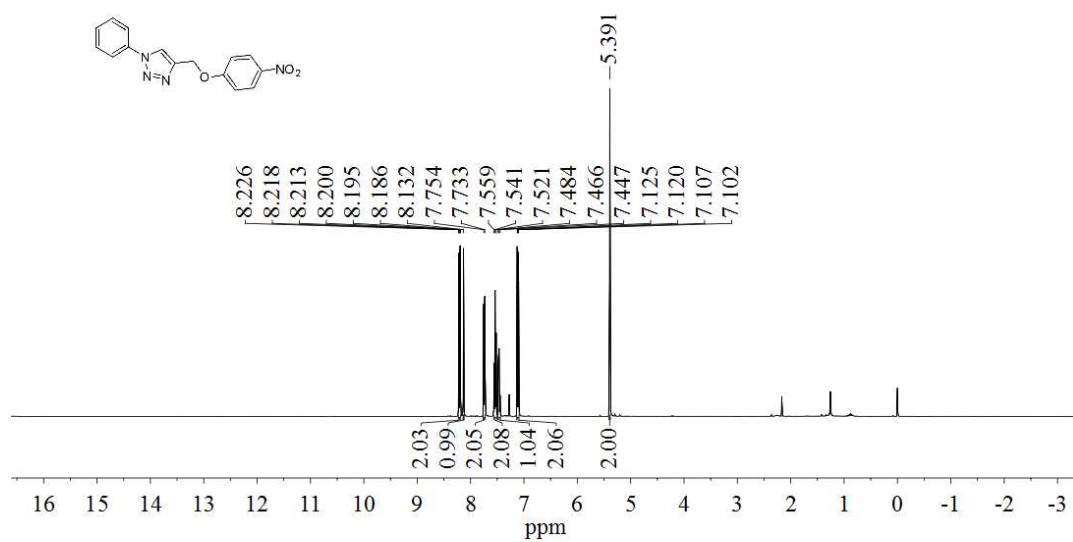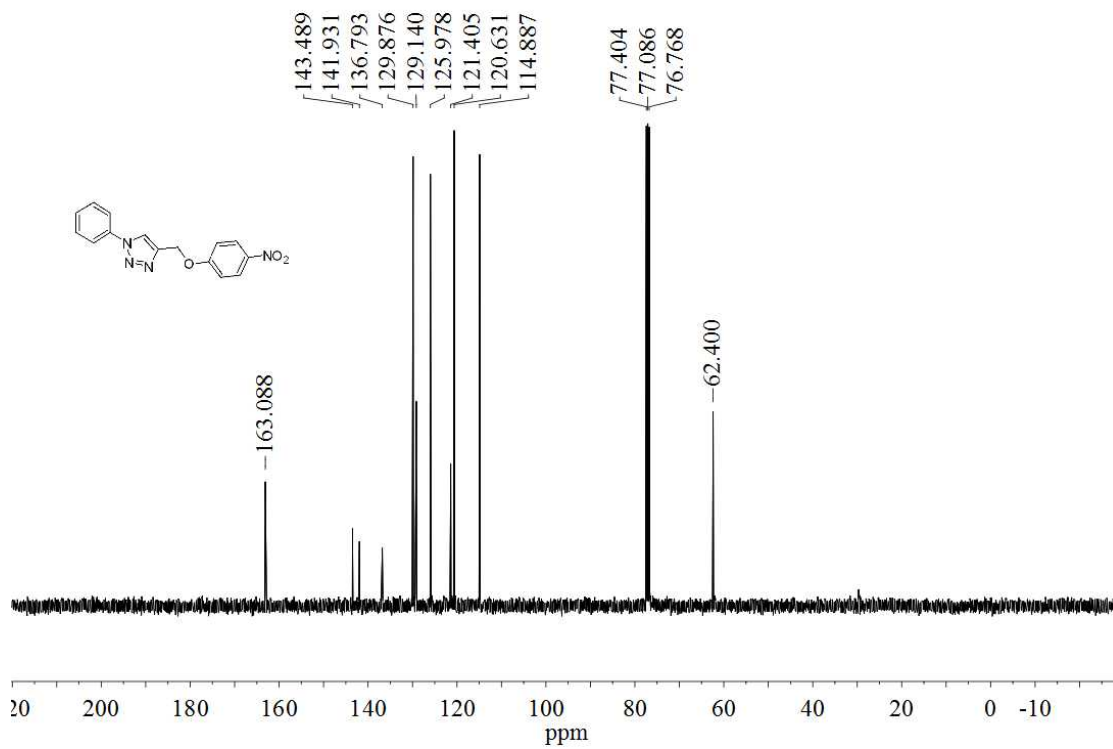

3r:

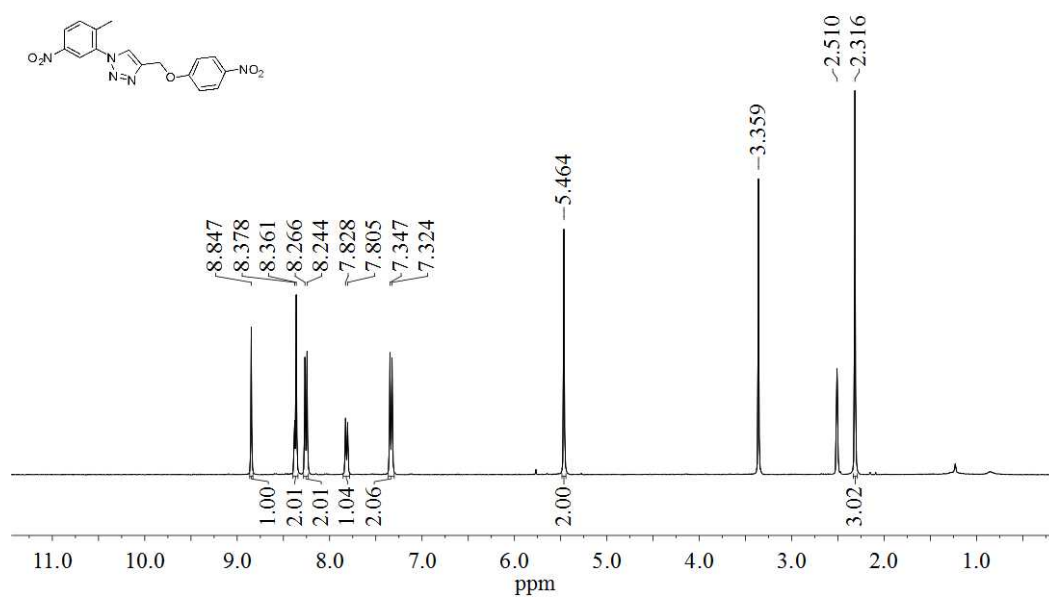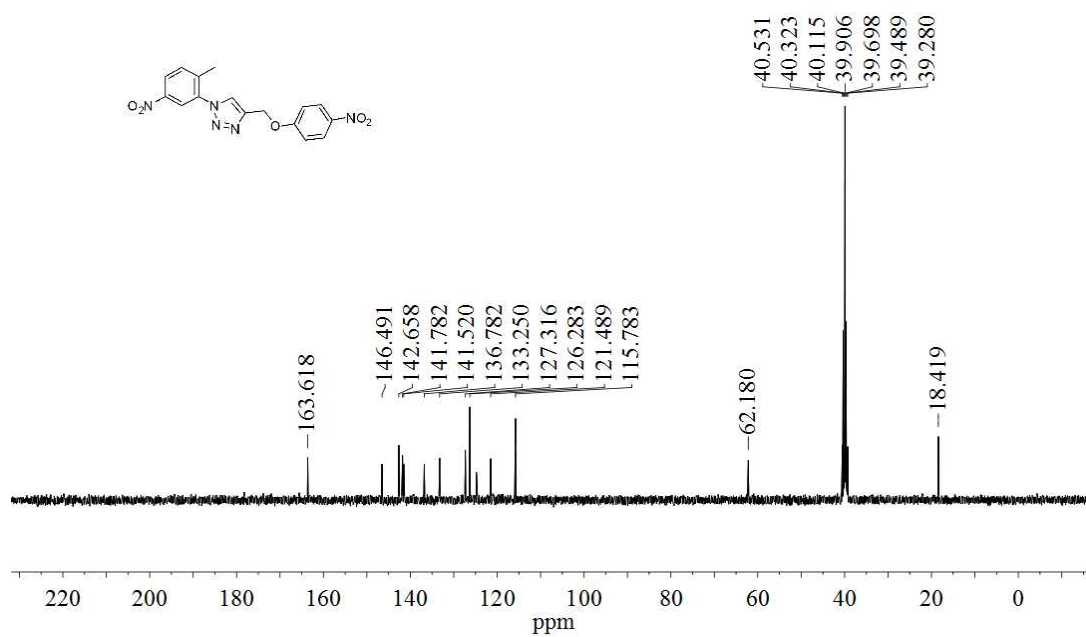

3s:

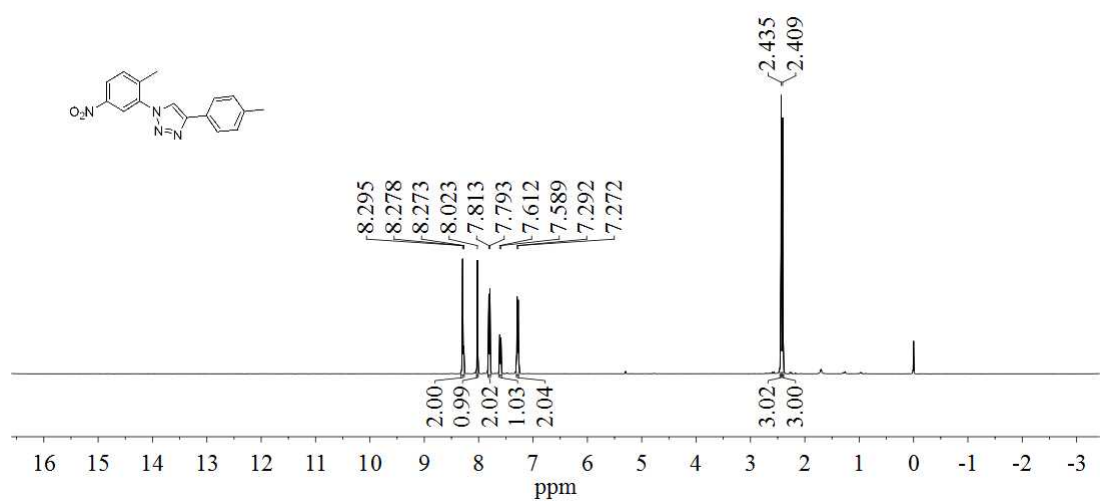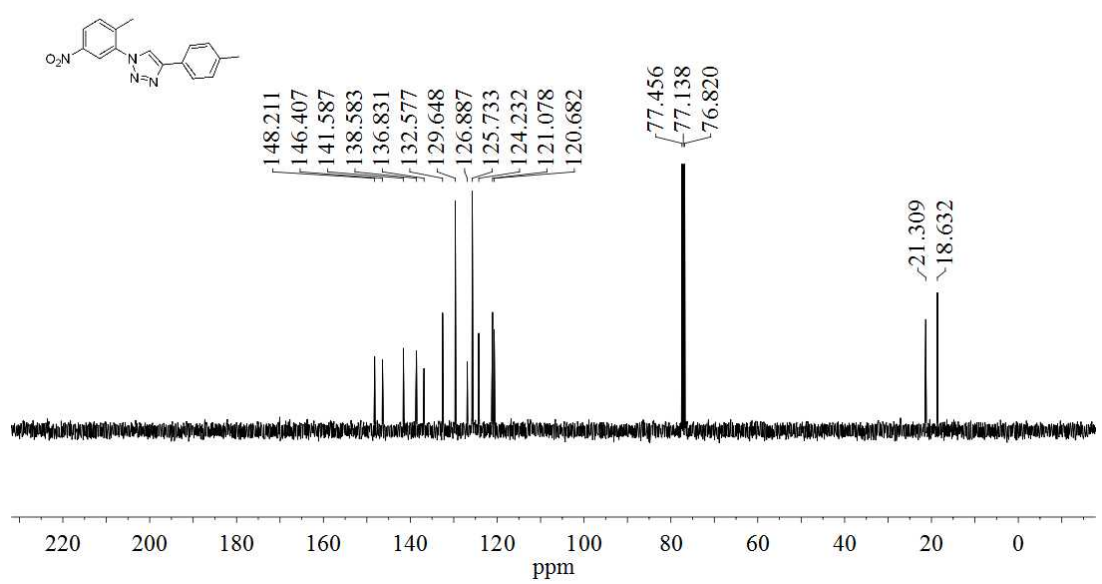

3t:

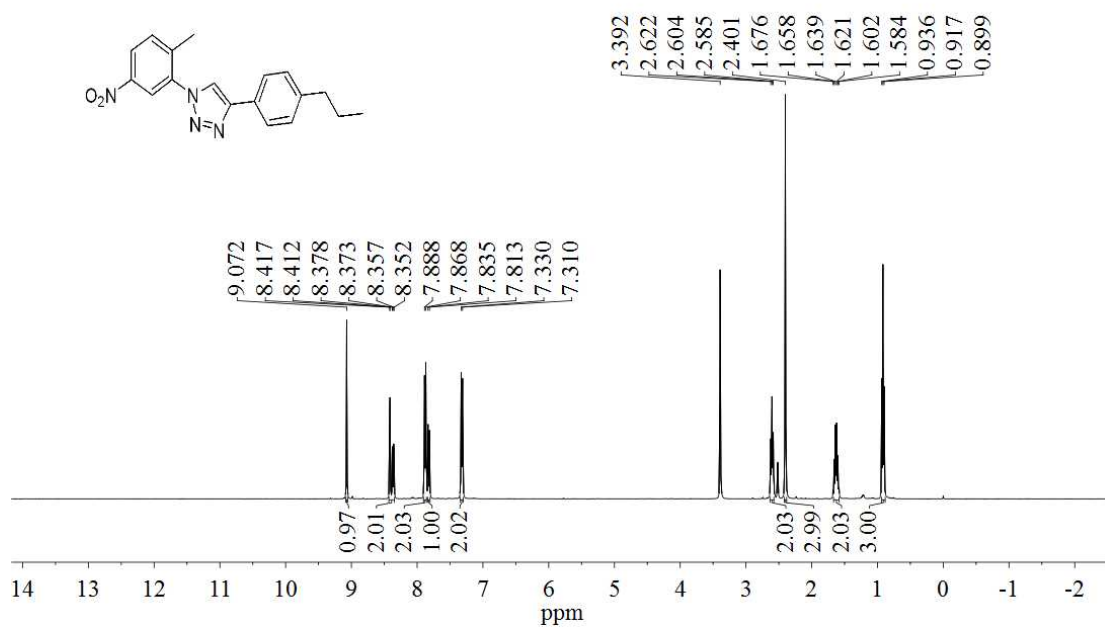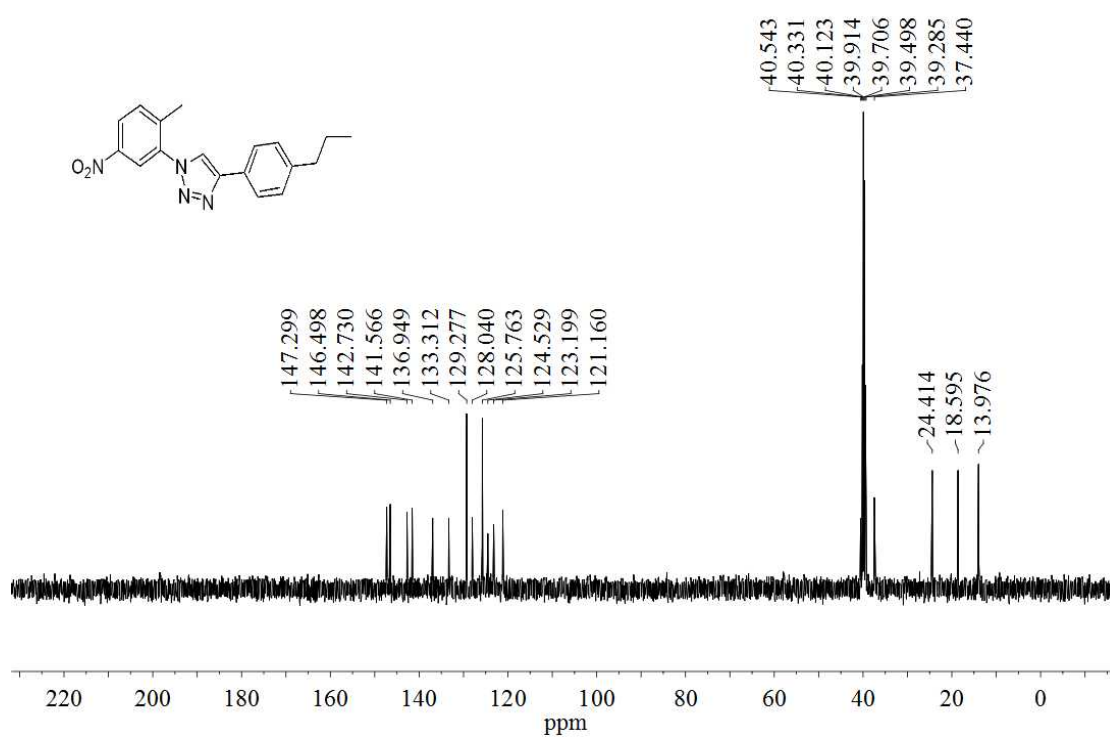

Supplement: c4ra14813d1.pdf [file c4ra14813d1.pdf]
